# Supplementary material for: Designing neoteric acidic deep eutectic solvents: an innovative, low-cost and environment-friendly strategy in the fast and facile production of 5-hydroxymethylfurfural
Source: Royal Society of Chemistry journal article supplement (doi:10.1039/d2re00541g), 2023-01-01
Supplement: d2re00541g1.pdf [file d2re00541g1.pdf]

## Supplementary Information

### **Toward designing neoteric acidic deep eutectic solvents: An innovative, low-cost and environment-friendly strategy in fast and facile production of 5-hydroxymethylfurfural**

Sabah Karimi,<sup>a</sup> Mahsa Niakan,<sup>b,c</sup> and Hemayat Shekaari<sup>a,\*</sup>

<sup>a</sup> Department of Physical Chemistry, Faculty of Chemistry, University of Tabriz, Tabriz, Iran

<sup>b</sup> Faculty of Chemistry, Kharazmi University, Tehran, Iran

<sup>c</sup> Research Institute of Green Chemistry, Kharazmi University, Tehran, Iran

E-mail address: hemayatt@yahoo.com

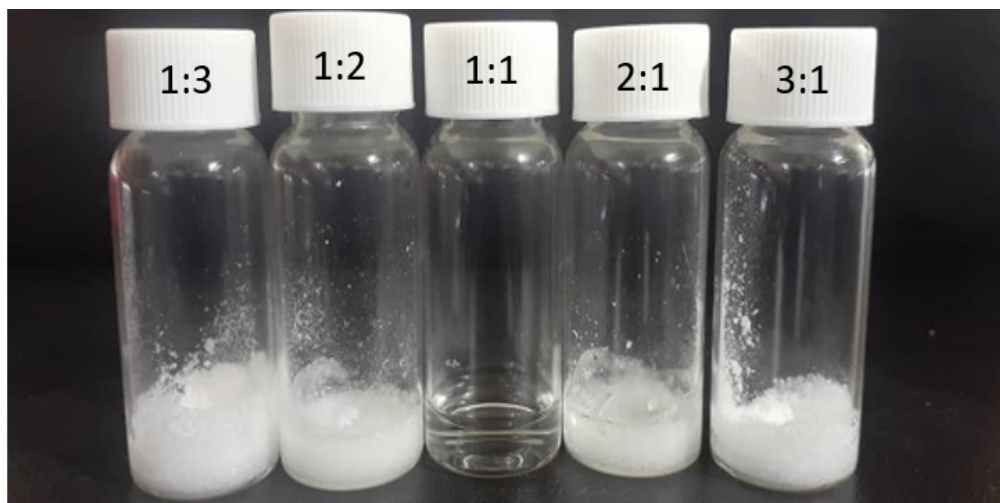

**Fig. S1.** The appearance of Oxalic:Malonic mixtures of different molar ratios at 363.15K.

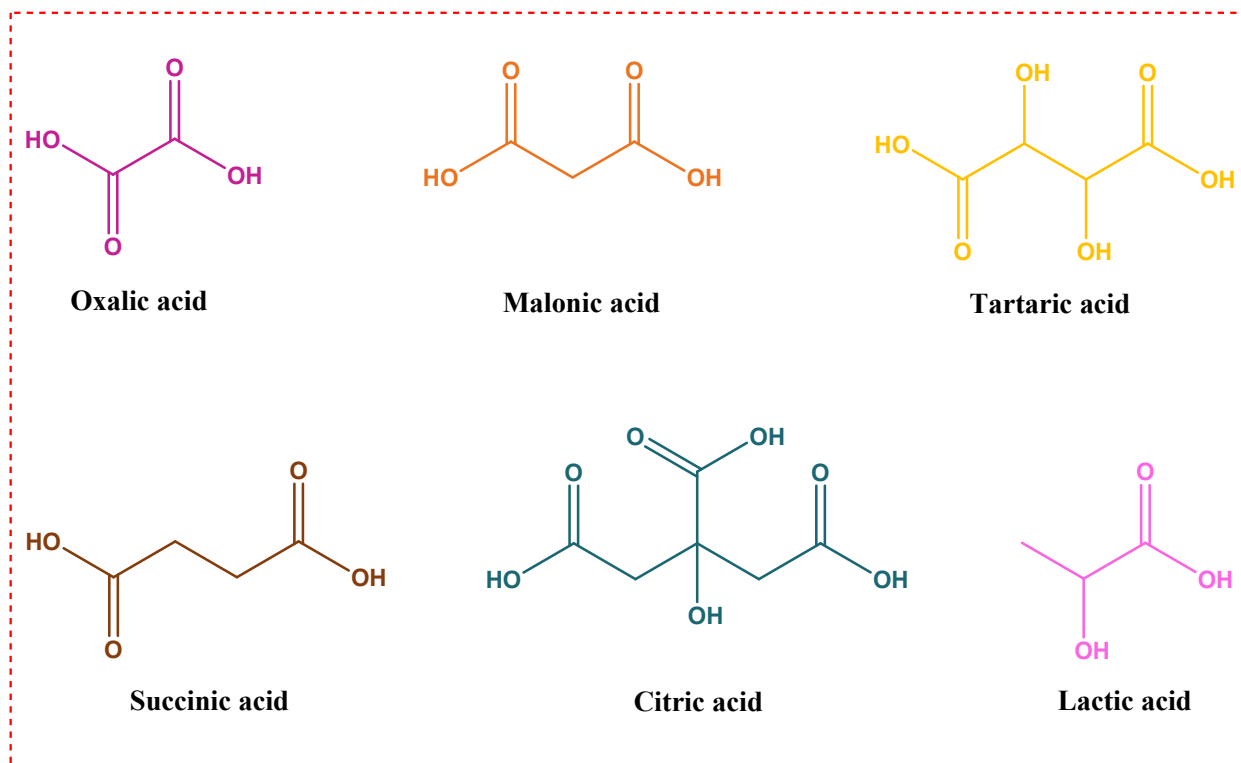

**Fig. S2.** Structural formula of carboxylic acids used in this work.

### 1.1. General procedure for the synthesis of 5-HMF

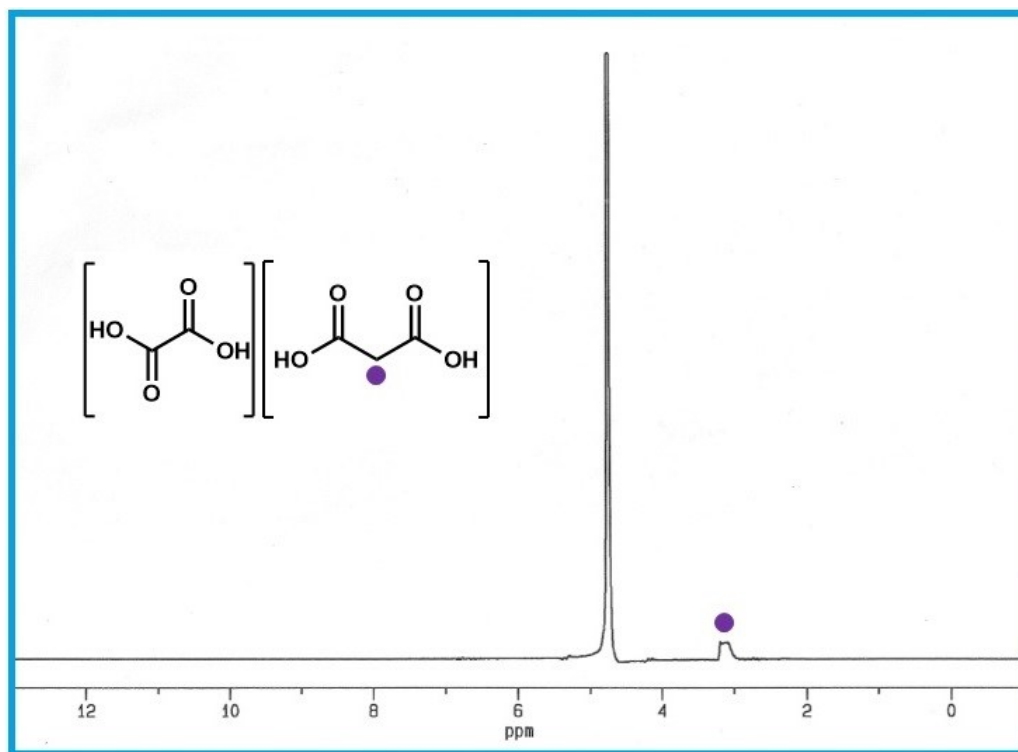

**Fig. S3.**  $^1\text{H}$  NMR spectrum of Oxalic:Malonic in  $\text{D}_2\text{O}$ .

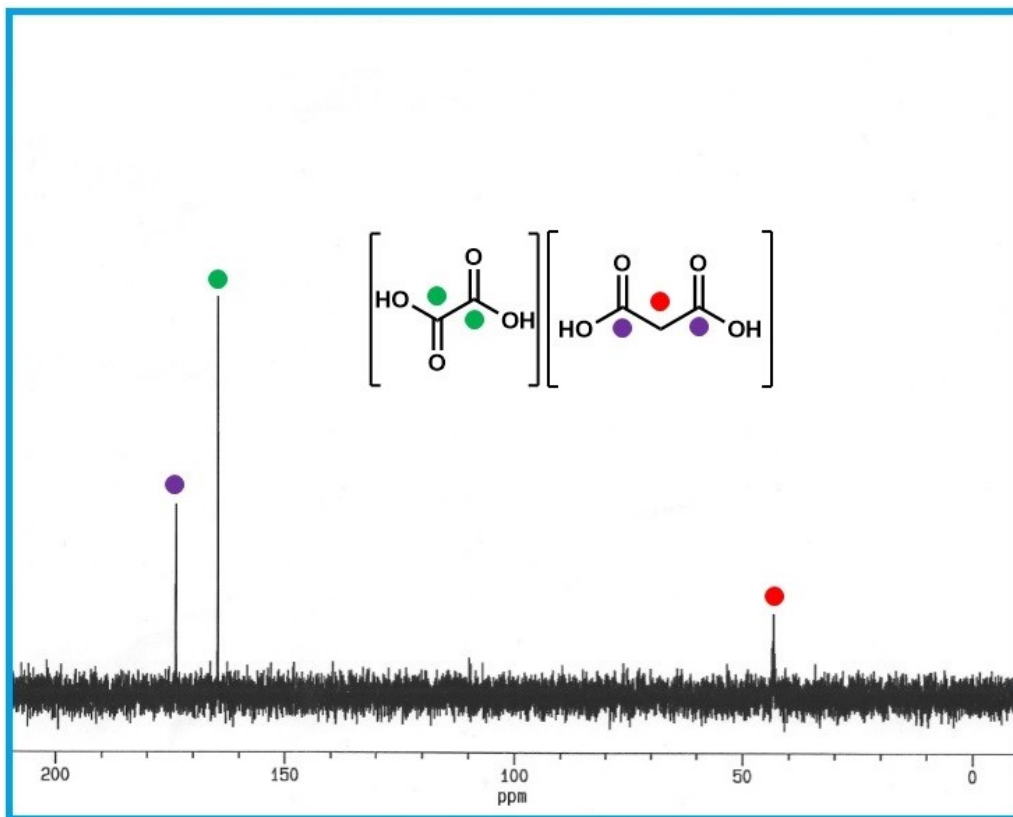

**Fig. S4.**  $^{13}\text{C}$  NMR spectrum of Oxalic:Malonic in  $\text{D}_2\text{O}$ .

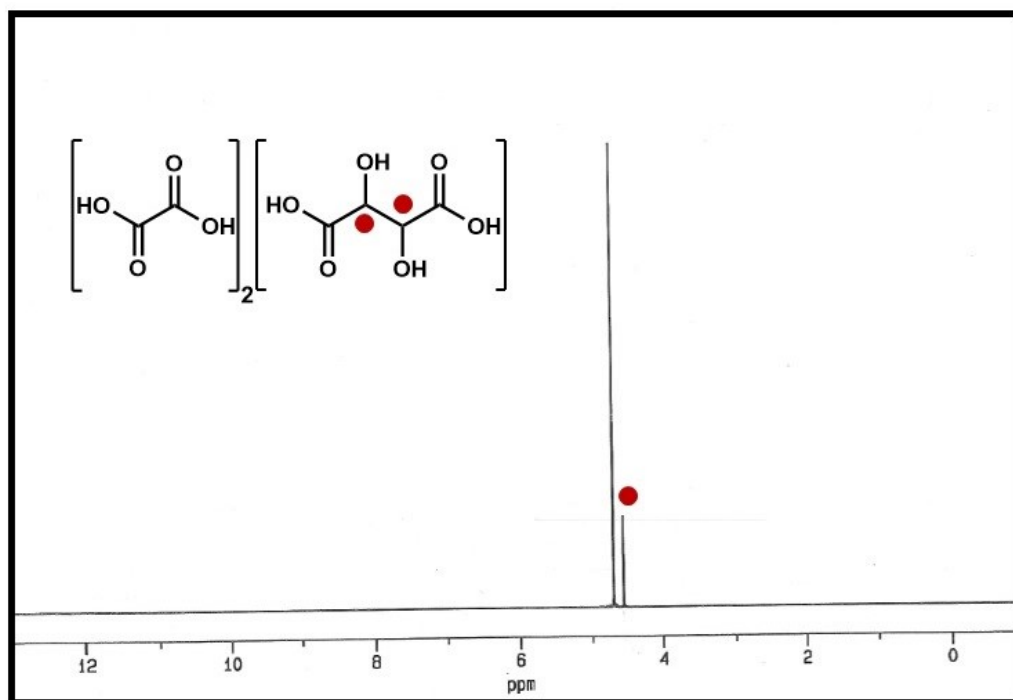

**Fig. S5.**  $^1\text{H}$  NMR spectrum of Oxalic:Tartaric in  $\text{D}_2\text{O}$ .

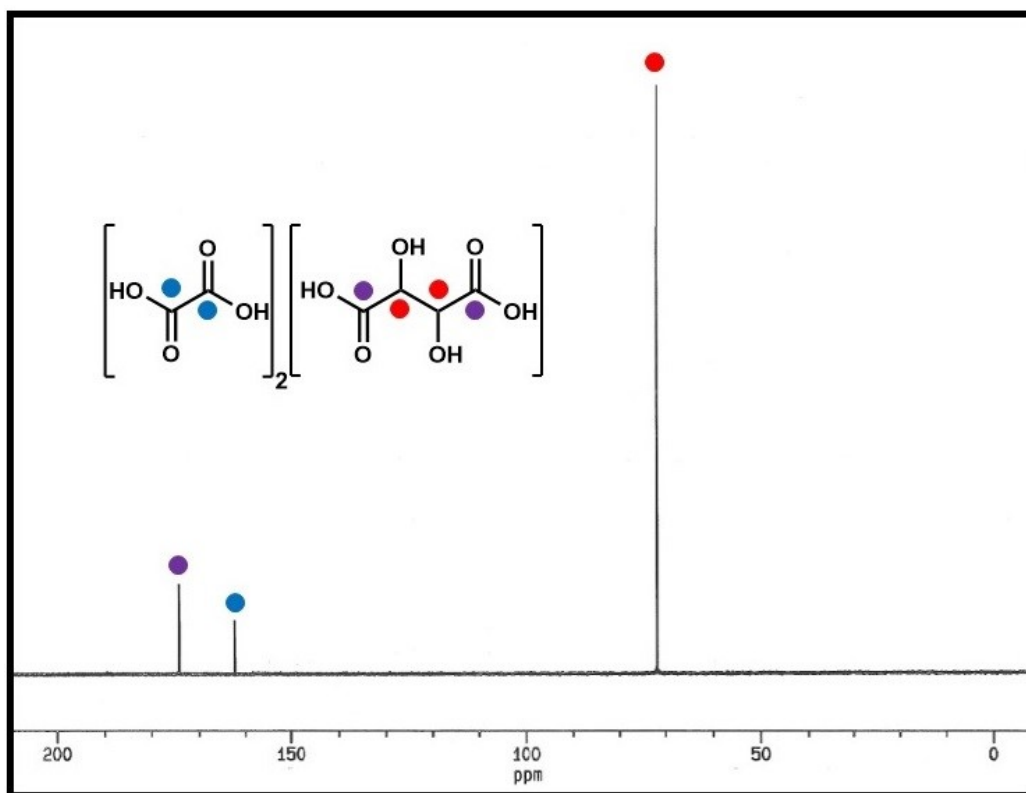

**Fig. S6.**  $^{13}\text{C}$  NMR spectrum of Oxalic:Tartaric in  $\text{D}_2\text{O}$ .

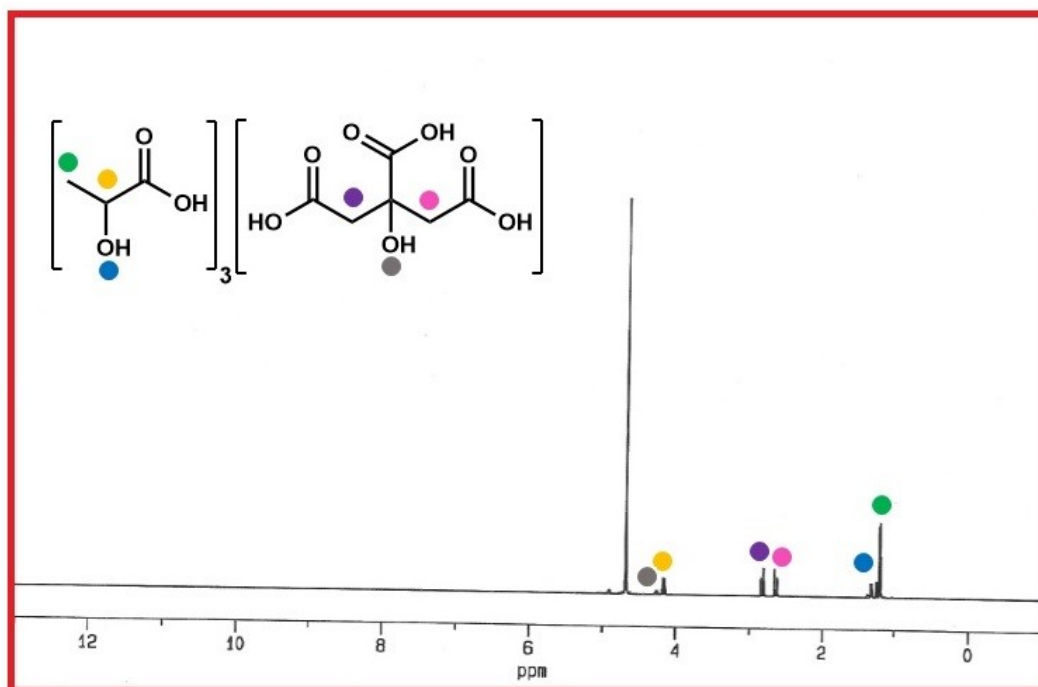

**Fig. S7.**  $^1\text{H}$  NMR spectrum of Citric:Lactic in  $\text{D}_2\text{O}$ .

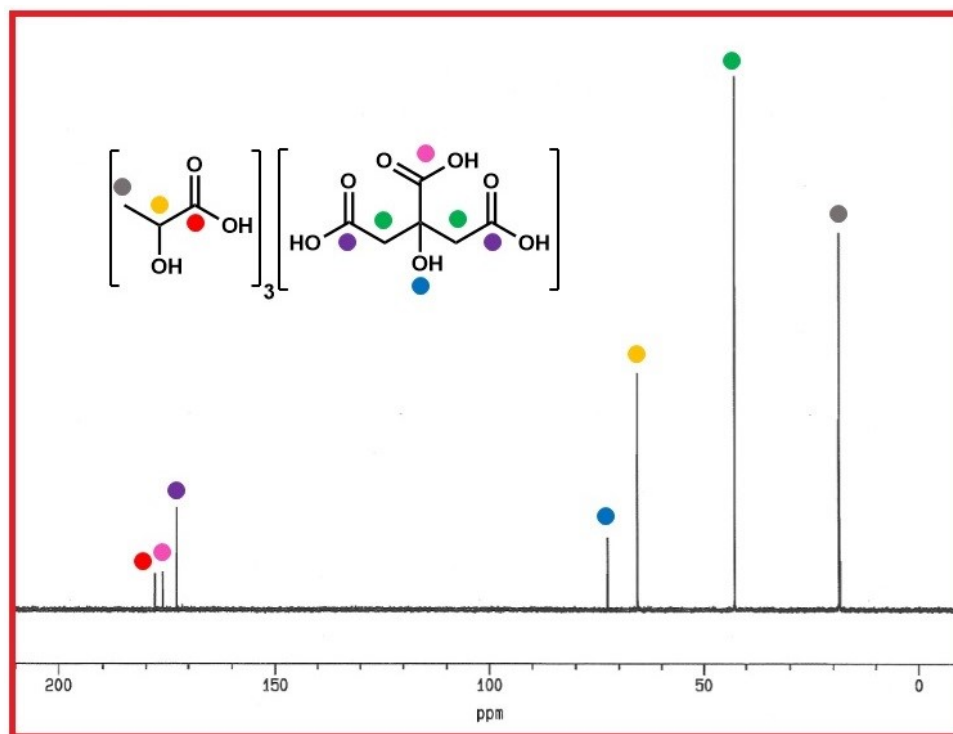

**Fig. S8.**  $^{13}\text{C}$  NMR spectrum of Citric:Lactic in  $\text{D}_2\text{O}$ .

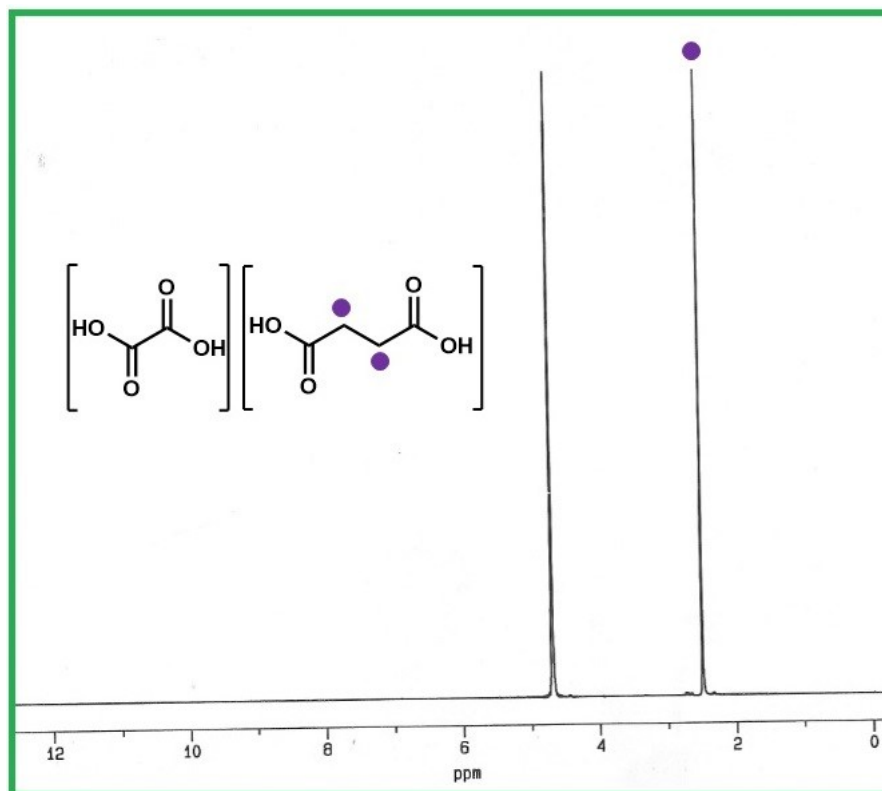

**Fig. S9.**  $^1\text{H}$  NMR spectrum of Oxalic:Succinic in  $\text{D}_2\text{O}$ .

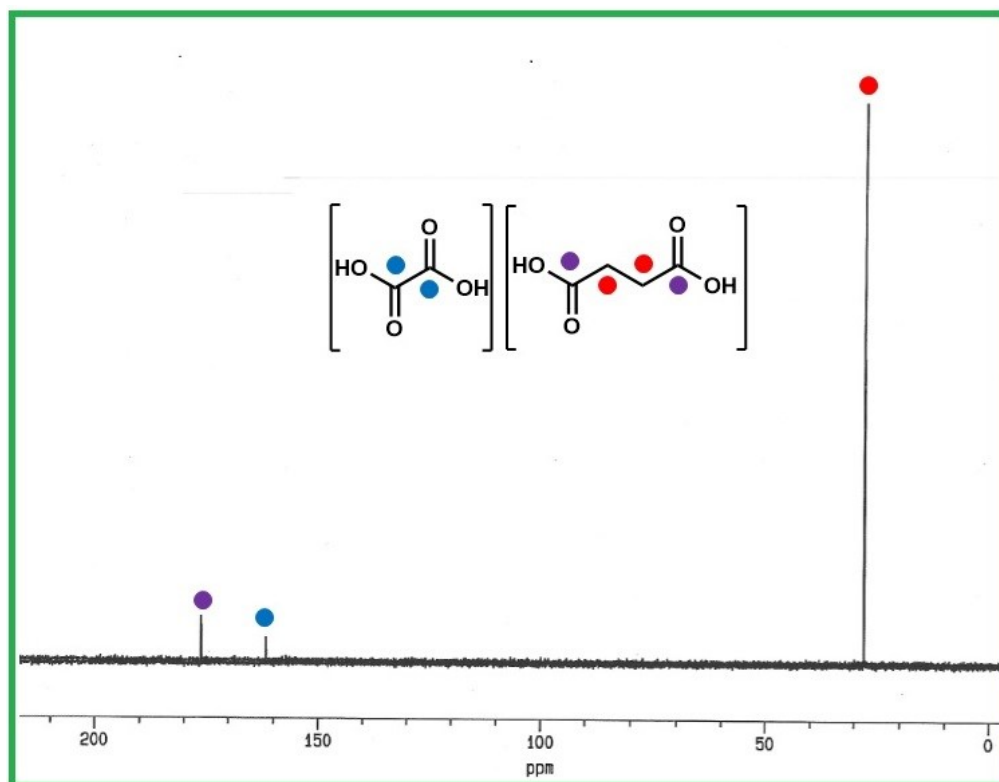

**Fig. S10.**  $^{13}\text{C}$  NMR spectrum of Oxalic:Succinic in  $\text{D}_2\text{O}$ .

Due to the acidic nature of the prepared NADESs, they could provide the dual function of both reaction media and catalysts for the dehydration of fructose into 5-HMF. Initially, in order to find more efficient NADES as catalyst and solvent for 5-HMF production, the prepared acidic NADESs were tested in the dehydration of fructose under identical reaction conditions.

The suggested mechanism illustrates that all NADESs were very effective for the conversion of fructose to 5-HMF, affording 5-HMF in excellent yields. Significantly, the reactions were rapid and completed in very short spans of time. This phenomenon can be attributed to the dual roles of NADESs as catalysts and solvents which effectively facilitated and simplified the reaction. All of the fructose dehydration experiments were performed in 10 mL round bottom flasks with stopper. For each reaction, 75 mg of fructose was dissolved in 3 mL of solvent. The mixture was heated to a desired temperature using an oil bath for a given reaction time under magnetic stirring. After the completion of reaction, ethyl acetate (10 mL) was added to the mixture in order to extract

5-HMF. After evaporation of the solvent, the residue was subjected to silica gel column chromatography (ethyl acetate-hexane, 1:9) to obtain the pure 5-HMF. The isolated 5-HMF was analyzed by HPLC,  $^1\text{H}$  and  $^{13}\text{C}$  NMR spectroscopies. The 5-HMF yield was determined from this Eq.:

$$\text{5-HMF yield (\%)} = [\text{mol of isolated 5-HMF/mol of initial fructose}] \times 100$$

#### **4. Characterization of 5-HMF**

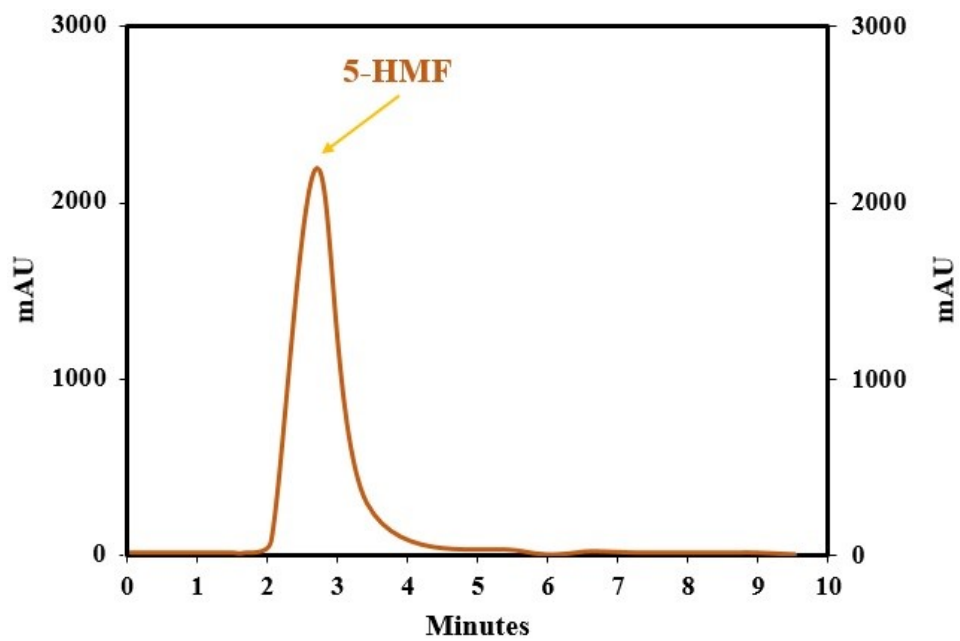

Fig. S11. HPLC analysis result of the isolated 5-HMF.

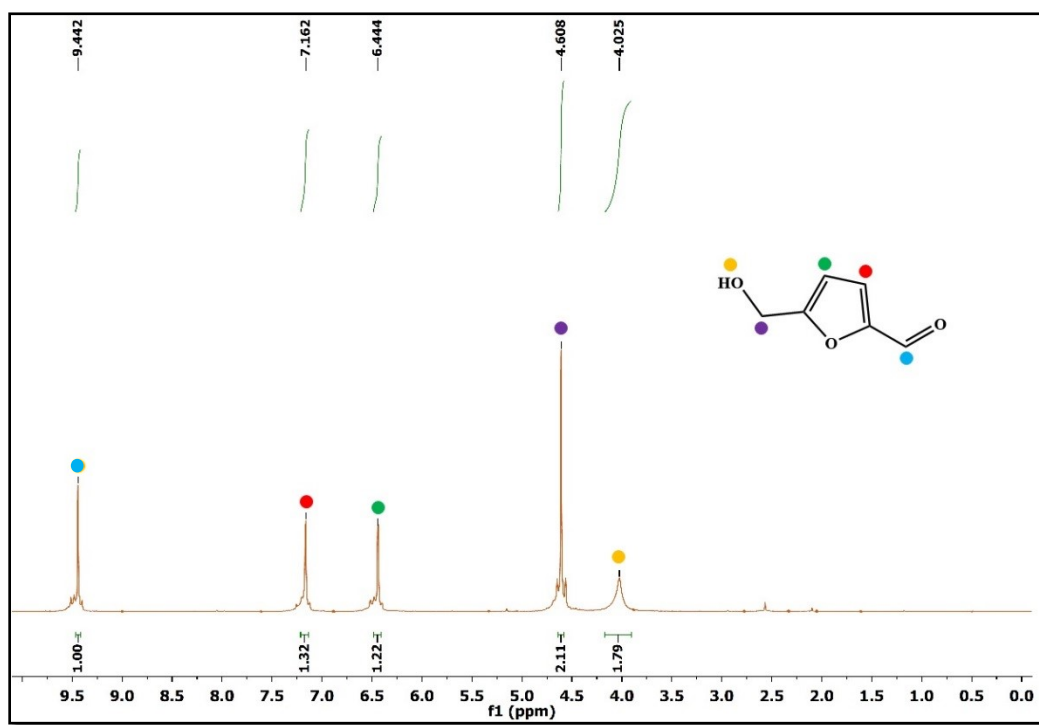

Fig. S12. <sup>1</sup>H NMR spectrum of the isolated 5-HMF in CDCl<sub>3</sub>.

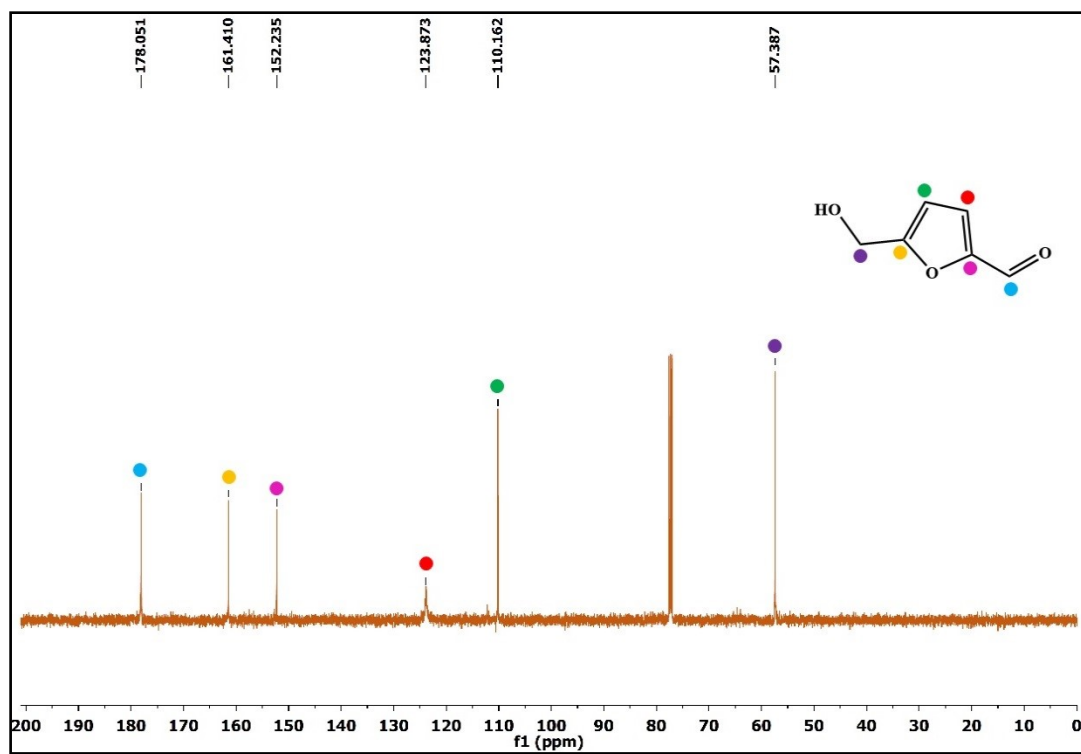

Fig. S13.  $^{13}\text{C}$  NMR spectrum of the isolated 5-HMF in  $\text{CDCl}_3$ .

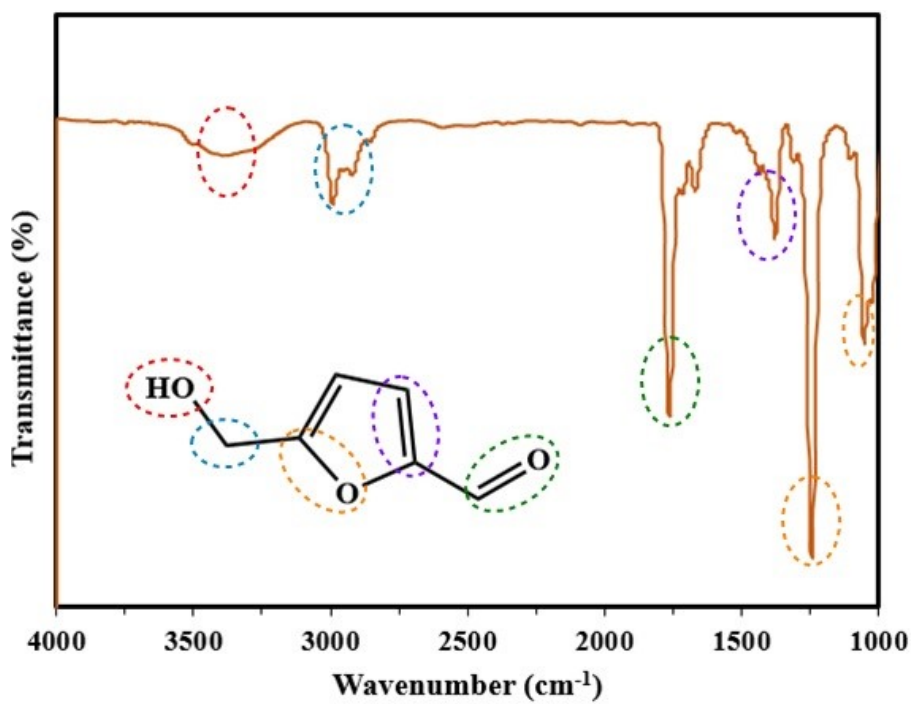

Fig. S14. FT-IR spectrum of the isolated 5-HMF.

## 5. Characterization of recycled NADES

It is critical to recover and reuse chemical to decrease the production cost and environmental impact in view of industrial application and green chemistry. Therefore, we decided to examine the recyclability of Oxalic:Malonic in the dehydration of fructose into 5-HMF.

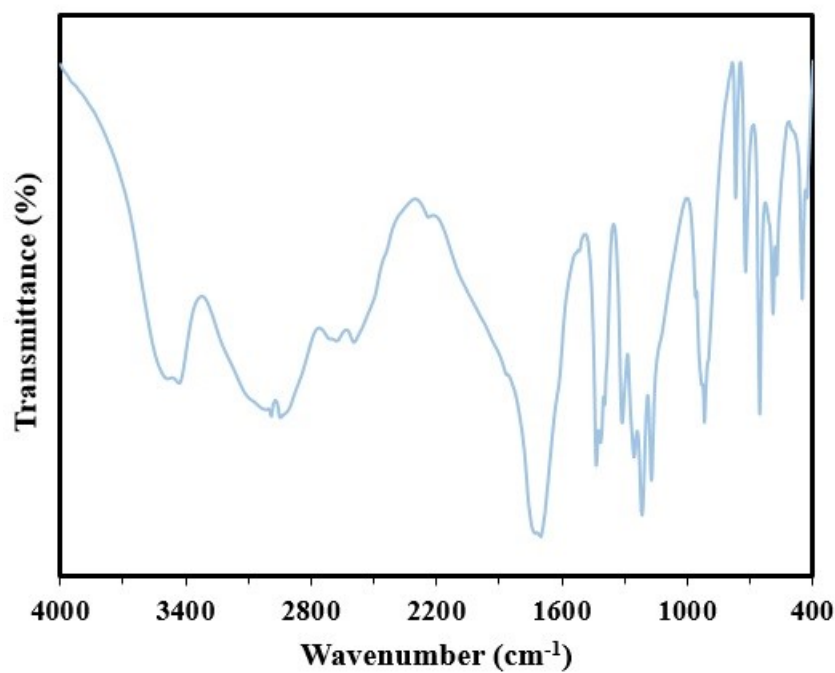

**Fig. S15.** FT-IR spectrum of the reused NADES (Oxalic:Malonic).

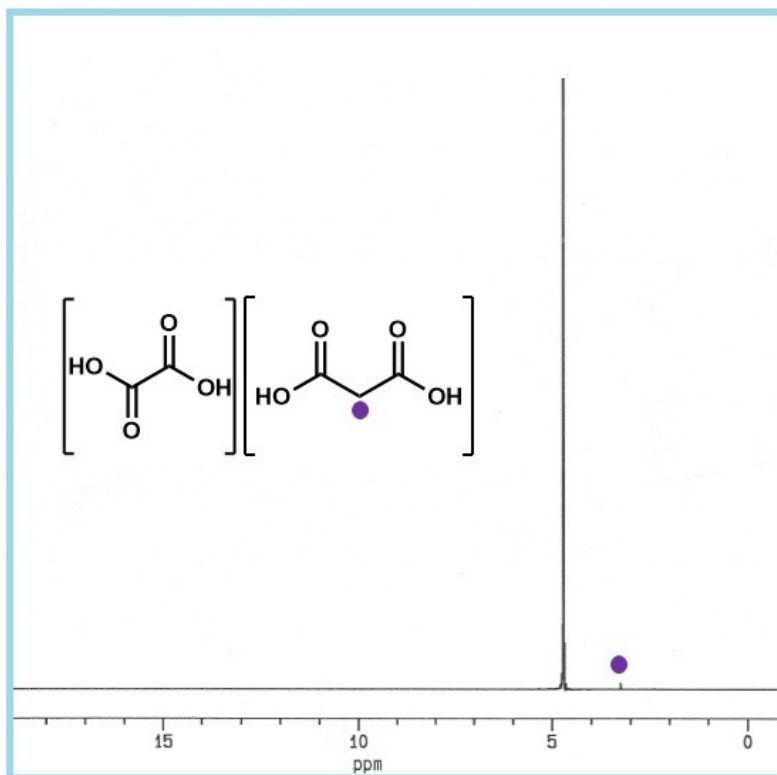

**Fig. S16.**  $^1\text{H}$  NMR spectrum of the reused NADES (Oxalic:Malonic) in  $\text{D}_2\text{O}$ .

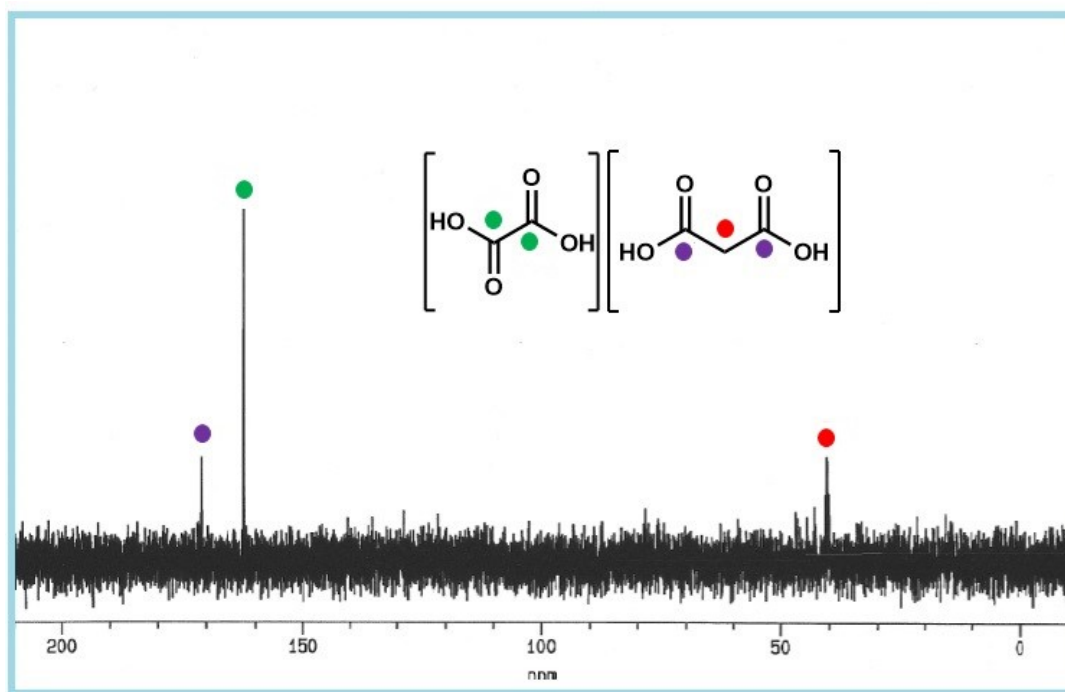

**Fig. S17.**  $^{13}\text{C}$  NMR spectrum of the reused NADES (Oxalic:Malonic) in  $\text{D}_2\text{O}$ .

## Calculation of the green chemistry metrics for the synthesis of 5-HMF from fructose in the presence of Oxalic:Malonic

**Table S1.** Calculation of the green chemistry metrics.

|   |                                                                                                 |                                                                                                                                                                                                                            |
|---|-------------------------------------------------------------------------------------------------|----------------------------------------------------------------------------------------------------------------------------------------------------------------------------------------------------------------------------|
| 1 | <b>Atom economy</b>                                                                             |                                                                                                                                                                                                                            |
|   | Atom Economy = (Exact molecular mass of 5-HMF / Exact Molecular mass of fructose) $\times$ 100% | = 126.11/180.16 $\times$ 100%<br>AE = <b>70%</b>                                                                                                                                                                           |
| 2 | <b>Reaction mass efficiency</b>                                                                 |                                                                                                                                                                                                                            |
|   | Reaction Mass Efficiency = (Mass of 5-HMF / Mass of fructose) $\times$ 100                      | = (0.05/ 0.07) $\times$ 100<br>RME = <b>71%</b>                                                                                                                                                                            |
| 3 | <b>E-factor</b>                                                                                 |                                                                                                                                                                                                                            |
|   | E-Factor = Amount of waste/ Amount of product                                                   | Total amount of reactant = 0.07 mg<br>Amount of final product = 0.05 mg<br>Amount of waste = (Total amount of reactant – amount of final product)<br>= (0.07-0.05) mg<br>= 0.02 mg<br>E-factor = (0.02 /0.05) = <b>0.4</b> |
| 4 | <b>Ecoscale</b>                                                                                 |                                                                                                                                                                                                                            |
|   | Ecoscale = (100 – Sum of individual penalties)                                                  | Ecoscale = 100–11.5<br>= <b>88.5</b>                                                                                                                                                                                       |

**Table S2.** Calculation of the penalty points for the Ecoscale calculation

| <b>Calculation of penalty points</b> |                                                                           |                |
|--------------------------------------|---------------------------------------------------------------------------|----------------|
|                                      | Parameters                                                                | Penalty points |
| 1                                    | <b>Reaction Yield</b>                                                     |                |
|                                      | Yield = 97%                                                               | 1.5            |
| 2                                    | <b>Price of reaction components (to obtain 0.4 mmol of final product)</b> |                |
|                                      | Fructose                                                                  | 0              |
|                                      | Oxalic acid                                                               | 0              |
|                                      | Malonic acid                                                              | 0              |
|                                      | Ethyl acetate                                                             | 0              |
| 3                                    | <b>Safety</b>                                                             |                |
|                                      | Fructose                                                                  | 0              |
|                                      | Oxalic acid                                                               | 0              |
|                                      | Malonic acid                                                              | 0              |
|                                      | Ethyl acetate (T)                                                         | 5              |
| 4                                    | <b>Technical setup</b>                                                    |                |
|                                      | Common setup                                                              | 0              |
| 5                                    | <b>Temperature/Time</b>                                                   |                |
|                                      | Heating, < 1 h                                                            | 2              |
| 6                                    | <b>Work and Purification</b>                                              |                |
|                                      | Liquid-liquid extraction                                                  | 3              |
|                                      | Total penalty points                                                      | <b>11.5</b>    |
